# Supplementary material for: RORα Suppresses Cancer-Associated Inflammation by Repressing Respiratory Complex I-Dependent ROS Generation
Source: MDPI journal article supplement (doi:10.3390/ijms221910665), 2021-10-01
Supplement: s1 [file s1]

**Supplementary Table S1. Significant differentially expressed genes (from top to bottom)**

|         |        |            |         |         |          |
|---------|--------|------------|---------|---------|----------|
| APOL6   | GFPT2  | PLCL2      | IL6     | ADAM8   | TINAGL1  |
| AREG    | KRT19  | TERC       | CXCL1   | RALB    | MOXD1    |
| KCTD2   | RGS9   | SCD5       | MAP3K13 | GRAMD3  | C12orf28 |
| PDZK1   | SAMD9L | TPRG1      | FYN     | ITGB3   | EXOC6B   |
| TTC39B  | PLCD4  | TMOD2      | SRD5A3  | CSAD    | AKR1C2   |
| ARHGEF6 | NCOA   | tcag7.1177 | PLEKHH2 | PHLDB1  | PDE4B    |
| STAC    | SRPX2  | KCTD14     | GMFG    | TBX15   | LYZ      |
| RNASE1  | UEVLD  | SERINC5    | 40970   | GSN     | ANKH     |
| MAN2A2  | LHFPL2 | RORA       | ARNTL   | CCNDBP1 | ACPL2    |

**Supplementary Table S2. Primers.**

| Gene         | Primer  | Sequences (5'-3')          |
|--------------|---------|----------------------------|
| ROR $\alpha$ | RTPCR-F | TAACGAATTCGCCACCATGGAGTCAG |
|              | RTPCR-R | CAATGGATCCCCCATCAATTTGCATT |
| IL-6         | RTPCR-F | ACTCACCTCTTCAGAACGAATTG    |
|              | RTPCR-R | CCATCTTTGGAAGGTTTCAGGTTG   |
| IL-8         | RTPCR-F | TTTTGCCAAGGAGTGCTAAAGA     |
|              | RTPCR-R | AACCCTCTGCACCCAGTTTTTC     |
| IL-24        | RTPCR-F | TGTGAAAGACACTATGCAAGCTC    |
|              | RTPCR-R | GTGACACGATGAGAACAAAGTTG    |
| IL-32        | RTPCR-F | GCTTCCCGAAGGTCCTCTCT       |
|              | RTPCR-R | ATAAGCCGCCACTGTCTCCA       |
| Cxcl1        | RTPCR-F | GGGGACTTCACGTTACACTT       |
|              | RTPCR-R | GCTCTTCCGCTCCTCTCACA       |
| Cxcl2        | RTPCR-F | TCGCACAGCCGCTCGAA          |
|              | RTPCR-R | GGGGACTTCACCTTCACACTTTG    |
| Cxcl3        | RTPCR-F | TGAATGTAAGGTCCCCCGGA       |
|              | RTPCR-R | CACCCTGCAGGAAGTGTCAA       |
| Cxcl5        | RTPCR-F | CCACGCAAGGAGTTCATCCC       |
|              | RTPCR-R | TTCCTTGTTTCCACCGTCCAA      |
| Cxcl10       | RTPCR-F | GTGGCATTCAAGGAGTACCTC      |
|              | RTPCR-R | TGATGGCCTTCGATTCTGGATT     |
| NDUFS6       | RTPCR-F | TTCGGTTTGTAGGTCGTCAGA      |
|              | RTPCR-R | AATGGTGGTGCTGTCTGAACT      |
| NDUFA7       | RTPCR-F | GTCCTAGCCACAAGCTCTCC       |

|          |         |                        |
|----------|---------|------------------------|
|          | RTPCR-R | CACAGGTAAGGCTGGTCCG    |
| NDUFA9   | RTPCR-F | TCCTGGGGCGATATGTTGTC   |
|          | RTPCR-R | TGGTTTCCCAGTCTCGTCCA   |
| NDUFA11  | RTPCR-F | ACAGAGTCACACTCAATCCTCC |
|          | RTPCR-R | AATCCCGTAGTTGTGCGTG    |
| 18S rRNA | RTPCR-F | ACCTGGTTGATCCTGCCAGT   |
|          | RTPCR-R | CTGACCGGGTTGGTTTTGAT   |

### Supplemental Figure S1

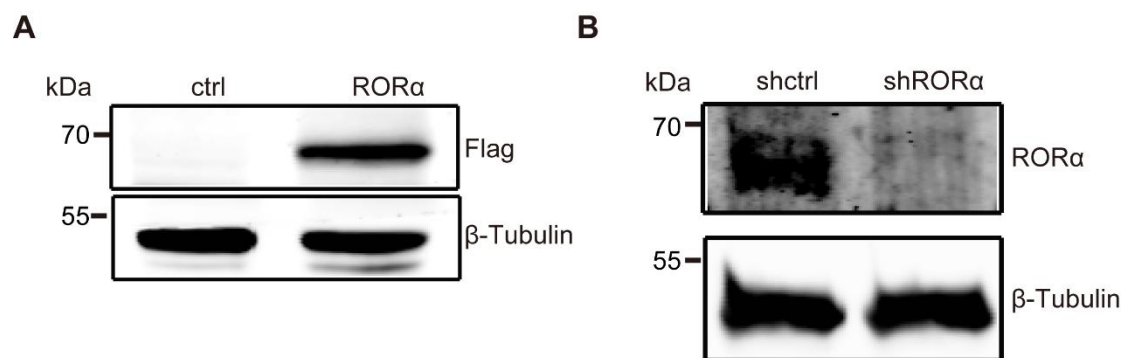

(A) Western blot analysis of flag-tagged RORα protein levels in control and RORα-expressing MDA-MB-231 cells. (B) Western blot analysis of RORα protein levels in control and RORα-silenced MCF-10A cells.

### Supplemental Figure S2

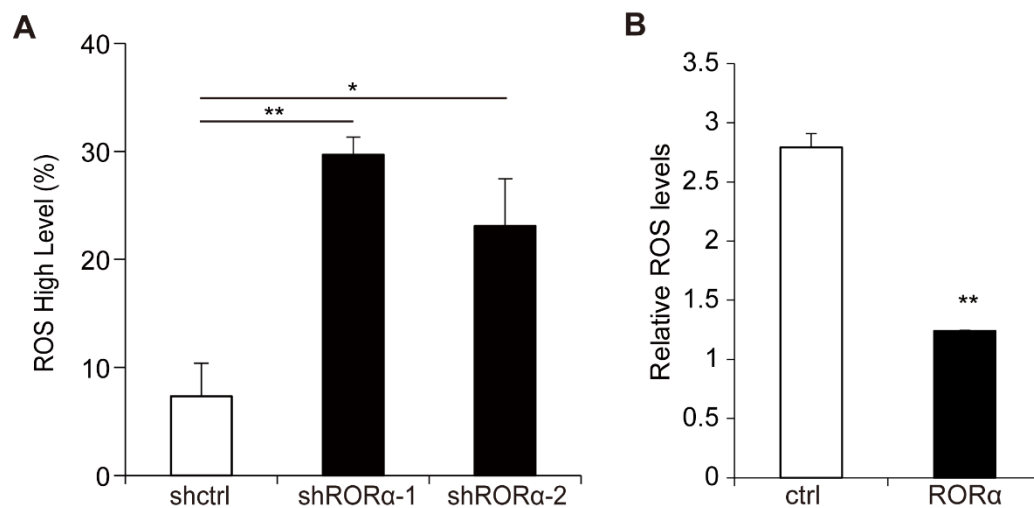

(A) FACS analysis quantified ROS levels in control and ROR $\alpha$ -silenced S1 cells; results are presented as mean  $\pm$  SEM; n=4, \*\* p<0.01, \* p<0.05, one-way ANOVA test.

(B) FACS quantification of ROS levels in control and ROR $\alpha$ -expressing MDA-MB-157 cells; results are presented as mean  $\pm$  SEM; n=4, \*\* p<0.01, Student's t-tests.

### Supplemental Figure S3

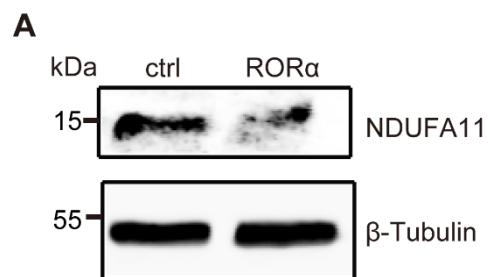

(A) Western blot analysis of NDUFA11 protein levels in control and ROR $\alpha$ -expressing MDA-MB-231 cells.

### Supplemental Figure S4

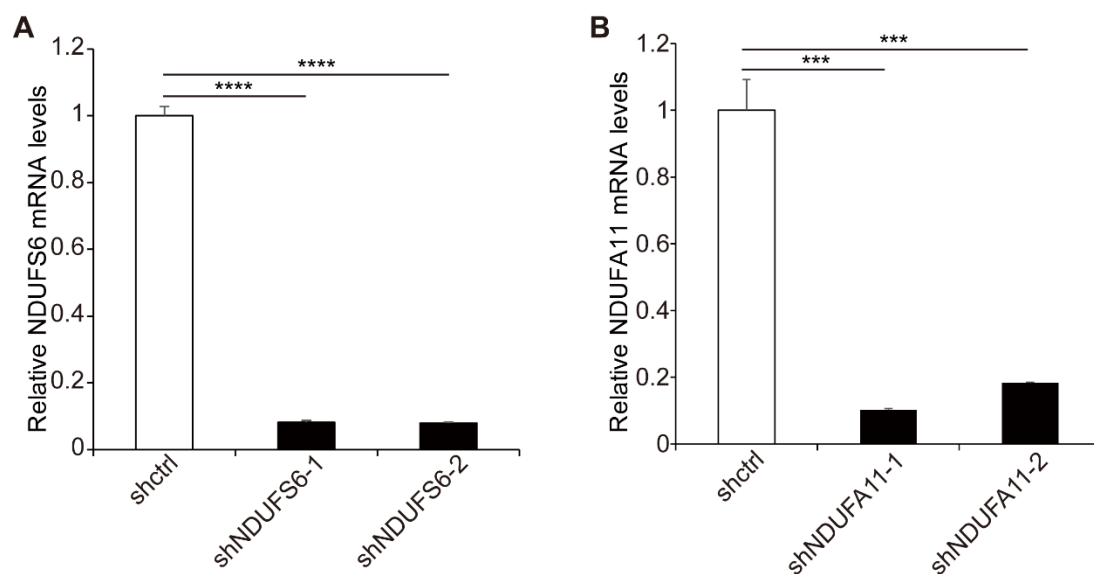

(A) Real-time RT-PCR quantified NDUFS6 mRNA levels in control and NDUFS6-

silenced MDA-MB-231 cells; results are presented as mean  $\pm$  SEM; n=4, \*\*\*\* p < 0.0001, one-way ANOVA test. (B) Real-time RT-PCR quantified NDUFA11 mRNA levels in control and NDUFA11-silenced MDA-MB-231 cells; results are presented as mean  $\pm$  SEM; n=4, \*\*\* p < 0.001, one-way ANOVA test.

### Supplemental Figure S5

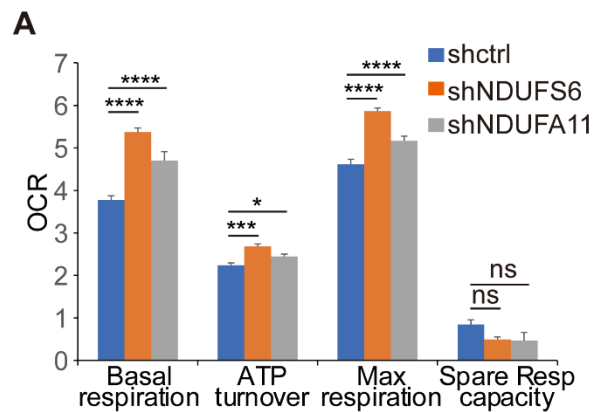

(A) Seahorse analysis quantified OCR in control, NDUFS6-silenced and NDUFA11-silenced MDA-MB-231 cells; results are presented as mean  $\pm$  SEM; n=12, \*\*\*\* p<0.0001, \*\*\* p<0.001, \* p<0.05, one-way ANOVA test.

## Supplemental Figure S6

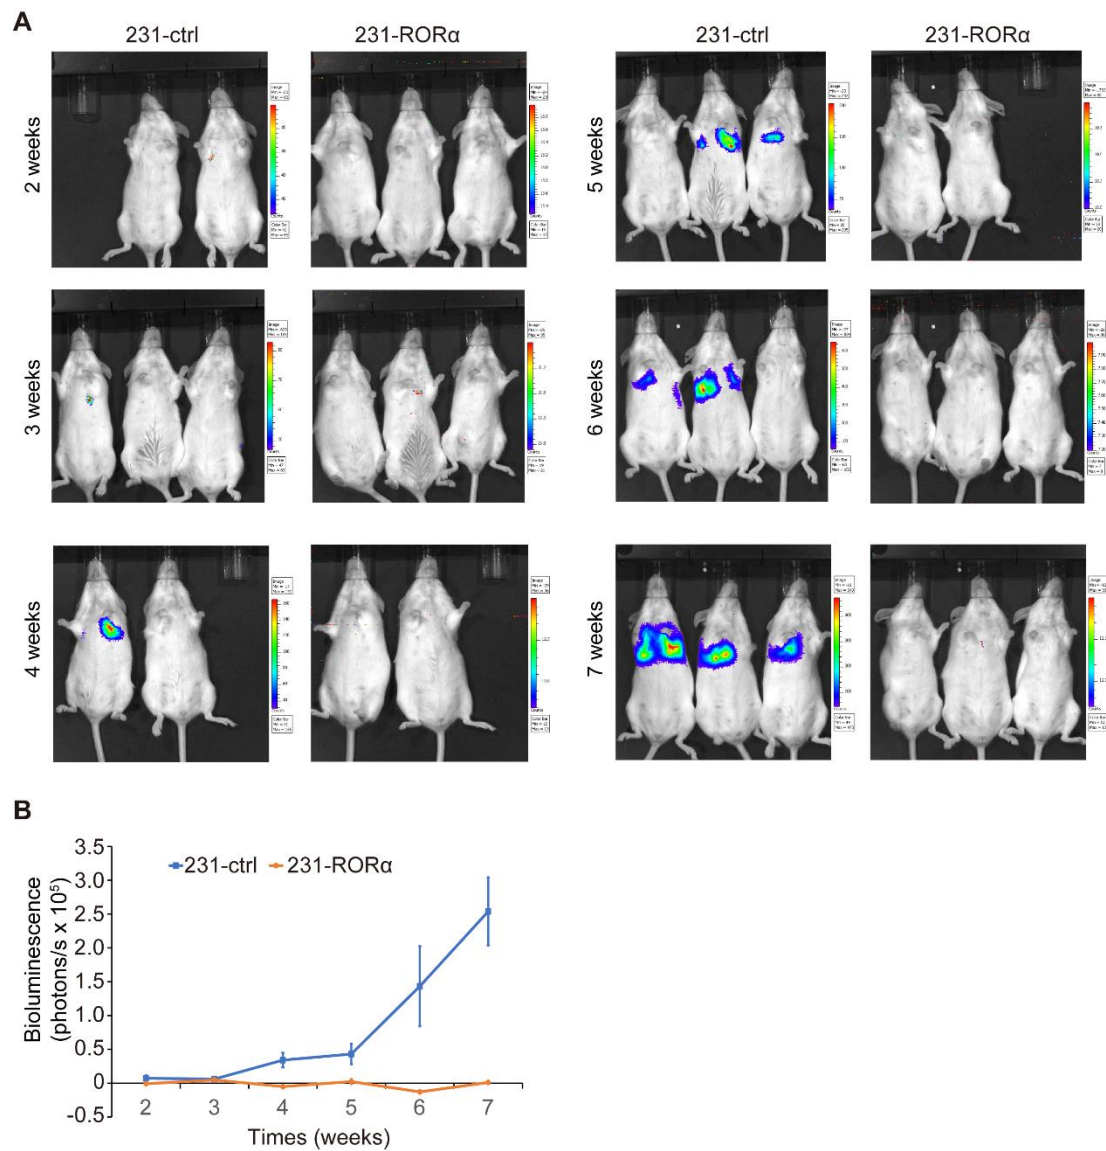

(A and B) IVIS images and quantification data showing lung colonization of control and ROR $\alpha$ -expressing MDA-MB-231-luc cells in SCID mice after tail vein injection 2 to 7 weeks; n=6 every group.

## Supplemental Figure S7

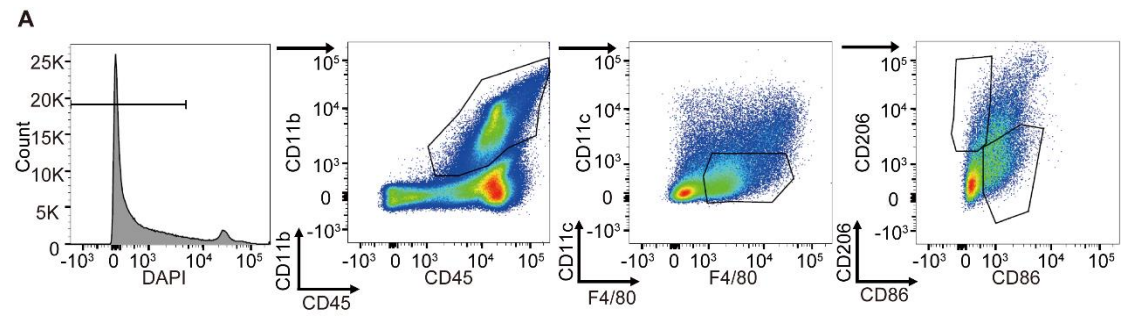

(A) FACS analysis and quantification of macrophages isolated from control or ROR $\alpha$ -expressing 4T1 cells injected BALB/c mice. Macrophages were identified as DAPI-, CD45+, CD11b+, CD11c- and F4/80+. Then macrophages were gated for M1 (CD86+CD206-) and M2 (CD86-CD206+).
